# Supplementary material
Source: publisher site journal article supplement (https://www.spandidos-publications.com/8650/downloadSupplementary)
Supplement: Supplementary file 1 [file downloadSupplementary]

## Sheet: Table SI
Table SI. Patient and disease characteristics of the CD138+ cell population of the analyzed patients with MM.
Disease characteristic	MM newly diagnosed (W03)	MM newly diagnosed (W04)	MM remission (W01)	MM relapsed (W02)
Male/female	Male	Male	Male	Male
Stage according to D-S	IIIA	IIIA	IIIA	IIIA
Stage according to ISS	2	3	3	2
Paraprotein type	IgG	IgG	IgG	IgA
Paraprotein concentration, g/l	79.71	68.93	38.66	4.84
Dominant light chain	λ	κ	κ	κ
λ chain concentration, g/l	984.99	15.42	12.54	9.92
κ chain concentration, g/l	5.66	56.81	730.78	495.71
MM, multiple myeloma; ISS, International Staging System; D-S, Durie-Salmon.

## Sheet: Table SII
Table SII. Authentication of the KMS12-BM (JCRB0429) and KMS12-PE (JCRB0430) cell lines by short tandem repeat analysis.
Similarity, %	Cell line	Source	Shared	D5S818	D7S820	D13S317	D16S539	vWA	THOI	POX	CSFIPO	Amelogenin	D3S1358	D21S11	D18S51	D8S1179	FGA	D19S433	D2S1338
		Your query		14, 14	12, 13	8, 8		14, 16	6, 9	8, 11	9, 9	X, X	16, 16	30.2, 32.2	15, 16	10, 16	20, 20	14, 14	18, 20
93.8	KMS-18	NIHS0483	8	14, 14	11, 12	8, 8	11, 11	14, 16	6, 9	8, 11	9, 9	X, X
93.8	KMS-12-PE	JCRB0430	8	14, 14	11, 12	8, 8	11, 11	14, 16	6, 9	8, 11	9, 9	X, X
90	KMS-12-PE	DSMZ: ACC-606	15	14, 14	11, 12	8, 8	11, 11	14, 16	6, 9	8, 11	9, 9	X, X	16, 16	30.2, 32.2	14, 15	16, 16	20, 20	14, 14	18, 20
87.5	KMS-12-BM	JCRB0429	8	14, 14	11, 11	8, 8	11, 11	14, 16	6, 9	8, 11	9, 9	X, X
86.7	KMS-12-BM	DSMZ: ACC-551	15	14, 14	11, 11	8, 8	11, 11	14, 16	6, 9	8, 11	9, 9	X, X	16, 16	30.2, 32.2	14, 15	10, 16	20, 20	13, 14	18, 20
86.7	KMS-12-BM	DSMZ: ACC-551	15	14, 14	11, 11	8, 8	11, 11	14, 16	6, 9	8, 11	9, 9	X, X	16, 16	30.2, 32.2	14, 15	10, 16	20, 20	13, 14	18, 20
vWA, von Willebrand factor; THOI, tyrosine hydroxylase intron 1; TPOX, thyroid peroxidase; CSFIPO, colony stimulating factor 1 receptor; FGA, fibrinogen ɑ-chain.

## Sheet: Table SIII
Table SIII. Authentication of the KMS12-BM (JCRB0429) and KMS12-PE (JCRB0430) cell lines by short tandem repeat analysis.
Similarity (%)	Cell line	Source	Shared	D5S818	D7S820	D13S317	D16S539	vWA	THOI	TPOX	CSFIPO	Amelogenin	D3S1358	D21S11	D18S51	D8S1179	FGA	D19S433	D2S1338
		Your query		14, 14	11, 11	8,8	11, 11	14, 16	6, 9	8, 11	9,9	X, X	16, 16	302, 31.2, 32.2	14, 15	10, 16	20, 20	13, 14	18,20
100	KMS-12-BM	JCRB0429	9	14, 14	11, 11	8,8	11, 11	14, 16	6, 9	8, 11	9,9	X, X
100	KMS-12-BM	DSMZ: ACC-551	16	14, 14	11, 11	8,8	11, 11	14, 16	6, 9	8, 11	9,9	X, X	16, 16	30.2, 32.2	14, 15	10, 16	20, 20	13, 14	18,20
100	KMS-12-BM	DSMZ: ACC-551	16	14, 14	11, 11	8,8	11, 11	14, 16	6, 9	8, 11	9,9	X, X	16, 16	30.2, 32.2	14, 15	10, 16	20, 20	13, 14	18,20
94.4	KMS-18	NIHS0483	9	14, 14	11, 12	8,8	11, 11	14, 16	6, 9	8, 11	9,9	X, X
94.4	KMS-12-PE	JCRB0430	9	14, 14	11, 12	8,8	11, 11	14, 16	6, 9	8, 11	9,9	X, X
90.6	KMS-12-PE	DSMZ: ACC-606	16	14, 14	11, 12	8,8	11, 11	14, 16	6, 9	8, 11	9,9	X, X	16, 16	30.2, 32.2	14, 15	16, 16	20, 20	13, 14	18,20
vWA, von Willebrand factor; THOI, tyrosine hydroxylase intron 1; TPOX, thyroid peroxidase; CSFIPO, colony stimulating factor 1 receptor; FGA, fibrinogen ɑ-chain.

## Sheet: Table SIV
Table SIV. Sequencing statistics and quality control metrics for individual barcodes of the KMS12-PE cell line.
Treatment	Total reads	Mean coverage	Read N50, bp
Control	370	1.715	16211
AZA 0.2 µmol/l	364	3.076	25771
AZA 0.5 µmol/l	456	3.556	21092
DAC 0.2 µmol/l	672	5.841	25167
DAC 0.5 µmol/l	433	2.89	19123
AZA, 5-azacytidine; DAC, 5-aza-2’-deoxycytidine.
